# Supplementary material for: The alarmones (p)ppGpp are part of the heat shock response of Bacillus subtilis
Source: PLoS Genet. 2020 Mar 16;16(3):e1008275. doi: 10.1371/journal.pgen.1008275 (PMC7098656; doi:10.1371/journal.pgen.1008275)
Supplement: S2 Dataset — This dataset lists all enriched functional categories and regulons for each condition in separate sheets. (XLSX) [file pgen.1008275.s017.xlsx]

## Sheet: Legend
	Dataset S2: Gene set enrichment analysis (GSEA) of ranked gene expression sets
		enriched categories/regulons	Subtiwiki ID of the enrichted category or Regulator
		Description	Description of the enriched category
		enrichmentScore	Score calculated as described in Subramanian et al. (2005) PNAS1
		pvalue	significance of the enrichment as determined by a permutation test with n=1000 as described in Subramanian et al.1
		p.adjust	significance level adjusted to Multiple Hypothesis Testing using the Benjamini-Hochberg method. P.adjust values below 0.05 were considered significant
		enriched genes	Ids of the genes considered enriched.
		gene names	common names of the enriched genes
		Analysis was carried out using Subtiwiki-Categories (ommiting categories 5 and 6) and -Regulons 2
		Software versions: GNU R3 version 3.5.1, clusterProfiler4 version 3.10.1
		1 Subramanian et al. Proceedings of the National Academy of Sciences Oct 2005, 102 (43) 15545-15550; DOI: 10.1073/pnas.0506580102
		2 Zhu et al, Nucleic Acids Research, Volume 46, Issue D1, 4 January 2018, Pages D743–D748, https://doi.org/10.1093/nar/gkx908
		3 R Core Team (2018). R: A language and environment for statistical computing. R Foundation for Statistical Computing, Vienna, Austria. URL https://www.R-project.org/.
		4 Guangchuang Yu, Li-Gen Wang, Yanyan Han and Qing-Yu He. clusterProfiler: an R package for comparing biological themes among gene clusters. OMICS: A Journal of Integrative Biology 2012, 16(5):284-287

## Sheet: wild type 37 °C vs 48 °C
wild type 37 °C vs. Wild type 48 °C
enriched categories	Description	enrichmentScore	pvalue	p.adjust	enriched genes	gene names
---
enriched regulons	Description	enrichmentScore	pvalue	p.adjust	enriched genes	gene names
CcpA	CcpA	-0.573691	0.0018018	0.0054054	BSU06960, BSU02130, BSU35930, BSU38040, BSU39250, BSU38050, BSU39270, BSU39260, BSU28900, BSU31190, BSU30260, BSU40050, BSU04470, BSU38570, BSU40060, BSU38560, BSU30270, BSU28910, BSU38580, BSU38590	yesN, glpQ, rbsD, sacA, yxiE, sacP, bglP, bglH, pftB, rhaM, melR, gntR, dctP, licA, gntK, licH, melE, pftA, licC, licB
SigA	SigA	-0.315731	0.0087566	0.0131349	BSU19180, BSU18440, BSU35930, BSU38040, BSU39250, BSU38050, BSU39270, BSU39260, BSU31190, BSU30260, BSU40050, BSU04470, BSU38570, BSU40060, BSU13890, BSU38560, BSU30270, BSU38580, BSU38590	des, gltB, rbsD, sacA, yxiE, sacP, bglP, bglH, rhaM, melR, gntR, dctP, licA, gntK, ptsG, licH, melE, licC, licB

## Sheet: wild type 37 °C vs 53 °C
wild type 37 °C vs. Wild type 53 °C
enriched categories	Description	enrichmentScore	pvalue	p.adjust	enriched genes	gene names
SW 4.3.1	General stress proteins (controlled by SigB)	0.441343	0.0010661	0.0148431	BSU00860, BSU04200, BSU04190, BSU00850, BSU33410, BSU07850, BSU39840, BSU02110, BSU00840, BSU00830, BSU28340, BSU09690, BSU12150, BSU27020, BSU13160, BSU07550, BSU05490, BSU10430, BSU00160, BSU04220, BSU04380, BSU38720, BSU39050, BSU02590, BSU03910, BSU33850, BSU04370, BSU30930, BSU04430, BSU34540, BSU00870, BSU08510, BSU23830, BSU08570, BSU23300, BSU00900, BSU38430, BSU14660, BSU06660, BSU36960,…	clpC, ydaE, ydaD, mcsB, yvgO, yfkM, yxbG, ybyB, mcsA, ctsR, ysnF, nhaX, yjgB, yraA, ohrB, yflT, mhqO, yhxD, yaaH, ydaG, ydaT, yxkO, katE, ycbP, gabD, yvbG, ydaS, ytaB, ydbD, clpP, radA, yfhF, yqjL, yfhK, ypuD, ispD, gspA, ykzI, opuE, ywlB, ydaP, aldY, ytkL, yjzE, yxiS, yacL, guaD, yhcM, yycD, yqhB, yfkT, disA, yuzA, yjgD, gsiB, cypC, yerD, hpf, trxA, mhqP, ydhK, ycdG, yugU, ctc, csbC
SW 2.2.2.16	Utilization of inositol	0.79798	0.0013514	0.0148431	BSU39690, BSU39750, BSU39720, BSU39700, BSU39710, BSU39740, BSU39730, BSU39760, BSU39670, BSU39680, BSU06230, BSU39770, BSU39780	iolH, iolB, iolE, iolG, iolF, iolC, iolD, iolA, iolJ, iolI, iolT, iolR, iolS
SW 1.2.1.1.1	Uptake of carbon sources	0.674687	0.0014164	0.0148431	BSU28750, BSU28740, BSU28730, BSU32600, BSU32590, BSU32580	araN, araP, araQ, frlO, frlN, frlM
SW 4.3.8	Resistance against oxidative and electrophile stress	0.415454	0.0034247	0.0148431	BSU32990, BSU40540, BSU33540, BSU19560, BSU23820, BSU12870, BSU07850, BSU38110, BSU08820, BSU19570, BSU27020, BSU13160, BSU05490, BSU05480, BSU04220, BSU21680, BSU39050, BSU21690, BSU23830, BSU40100, BSU08730, BSU38830, BSU40090, BSU39040, BSU13170, BSU24750, BSU34790, BSU32660, BSU12170, BSU02100, BSU06590, BSU35310, BSU28500, BSU05500, BSU03470, BSU05790	mrgA, hypR, azoR2, mhqD, yqjM, mhqA, yfkM, nfrA, katA, mhqE, yraA, ohrB, mhqO, mhqN, ydaG, msrB, katE, msrA, yqjL, ahpF, perR, aldY, ahpC, yxiS, guaD, yqhB, trxB, glxB, yjgD, cypC, yerD, hpf, trxA, mhqP, hxlR, ydhK
SW 2.4.2.1	Biosynthesis of fatty acids	-0.614802	0.0037736	0.0148431	BSU11330, BSU15920, BSU11720, BSU15890, BSU08650, BSU04030, BSU15880, BSU09540, BSU24340, BSU24350, BSU10170	fabHA, acpA, fabI, plsX, fabL, ycsD, fapR, plsC, accC, accB, fabHB
SW 3.3.1.10	Aminoacyl-tRNA synthetases	-0.633305	0.0037736	0.0148431	BSU22360, BSU06680, BSU27410, BSU27550, BSU28630, BSU15430, BSU27560, BSU11420, BSU28640, BSU28090, BSU29670	asnS, gatA, alaS, aspS, pheT, ileS, hisS, trpS, pheS, valS, tyrS
SW 1.2.1.1.5	Uptake of iron, siderophores	-0.652357	0.0038168	0.0148431	BSU03800, BSU01610, BSU32940, BSU33290, BSU10330, BSU08450, BSU33300, BSU33310, BSU39610, BSU08440, BSU07520, BSU33320	fpbN, feuC, yusV, fhuC, yhfQ, yfiZ, fhuG, fhuB, yxeB, yfiY, fecC, fhuD
SW 1.3.3.1	ABC transporters for the uptake of iron, siderophores	-0.652357	0.0038168	0.0148431	BSU03800, BSU01610, BSU32940, BSU33290, BSU10330, BSU08450, BSU33300, BSU33310, BSU39610, BSU08440, BSU07520, BSU33320	fpbN, feuC, yusV, fhuC, yhfQ, yfiZ, fhuG, fhuB, yxeB, yfiY, fecC, fhuD
SW 2.6.5.4	ABC transporters for the uptake of iron, siderophores.1	-0.652357	0.0038168	0.0148431	BSU03800, BSU01610, BSU32940, BSU33290, BSU10330, BSU08450, BSU33300, BSU33310, BSU39610, BSU08440, BSU07520, BSU33320	fpbN, feuC, yusV, fhuC, yhfQ, yfiZ, fhuG, fhuB, yxeB, yfiY, fecC, fhuD
SW 2.5.2.4	Biosynthesis, acquisition of pyrimidine nucleotides	0.610473	0.0054274	0.0189959	BSU15500, BSU15520, BSU15510, BSU15540, BSU15530, BSU15560, BSU15550, BSU15490	pyrC, pyrAB, pyrAA, pyrD, pyrK, pyrE, pyrF, pyrB
SW 4.1.1.2	Flagellar proteins	-0.49642	0.0067568	0.0214988	BSU35340, BSU35400, BSU35330, BSU35360, BSU13680, BSU36390, BSU13690, BSU36400	fliD, flgL, fliS, hag, motB, flhP, motA, flhO
SW 4.3.4	Heat shock proteins	0.53284	0.0119681	0.0349069	BSU13700, BSU00860, BSU00850, BSU00840, BSU00830, BSU39820, BSU25490, BSU14470, BSU34540, BSU00870, BSU13460	clpE, clpC, mcsB, mcsA, ctsR, htpG, hrcA, mreBH, clpP, radA, rsgI
SW 1.2.4.5	Metal ion transporter	0.56025	0.0155807	0.0419481	BSU26650, BSU13850, BSU33490, BSU09850, BSU09860, BSU25790	czcD, pfeT, cadA, khtU, khtT, arsB
SW 4.2.1.4	Sporulation proteins, other	0.34408	0.0188889	0.0472222	BSU00860, BSU00850, BSU33540, BSU10920, BSU19820, BSU00840, BSU37510, BSU12330, BSU12340, BSU12320, BSU12380, BSU10910, BSU12350, BSU25800, BSU00240, BSU12390, BSU12360, BSU36040, BSU24580, BSU30970, BSU03920, BSU30950, BSU27980, BSU24650, BSU36750, BSU27970, BSU36550, BSU00560, BSU30960, BSU24140, BSU28210, BSU24400, BSU09140, BSU37870, BSU18720	clpC, mcsB, azoR2, yitA, sprB, mcsA, pbpG, yjmD, uxuA, yjmC, uxaB, yisZ, yjmF, yqcK, csfB, uxaA, exuT, ywrJ, yqhH, glgC, glcU, glgA, spoIVFA, yqzG, spoIID, spoIVFB, spoIIQ, spoVT, glgD, mmgD, lonB, spoIIIAD, yhcM, spsE, yoaR
enriched regulons	Description	enrichmentScore	pvalue	p.adjust	enriched genes	gene names
SigA	SigA	0.264015	0.001	0.006718	BSU13700, BSU19930, BSU19920, BSU28750, BSU28740, BSU28730, BSU39690, BSU28720, BSU39910, BSU39750, BSU39720, BSU19940, BSU28760, BSU39700, BSU15500, BSU39710, BSU19890, BSU39740, BSU39890, BSU39730, BSU00860, BSU07400, BSU19970, BSU39760, BSU28770, BSU32600, BSU39670, BSU28790, BSU39680, BSU13850, BSU28780, BSU33490, BSU33960, BSU32990, BSU24960, BSU28800, BSU39900, BSU24980, BSU15520, BSU05880,…	clpE, yotC, yotD, araN, araP, araQ, iolH, abfA, yxnB, iolB, iolE, yotB, araM, iolG, pyrC, iolF, yotG, iolC, yxbB, iolD, clpC, yfmO, yosX, iolA, araL, frlO, iolJ, araB, iolI, pfeT, araD, cadA, araE, mrgA, pstBA, araA, yxbA, pstC, pyrAB, gmuG, yotI, mcsB, yotK, pyrAA, pstBB, frlN, azoR2, yotM, yotH, yotE, amhX, mhqD, frlM, pstA, pyrD, pyrK, yfmP, maeA, pyrE, pyrF, frlB, mhqA, ywkB, gmuF, nfrA, sprB…
CcpA	CcpA	0.360293	0.0010299	0.006718	BSU28750, BSU28740, BSU28730, BSU35080, BSU39690, BSU28720, BSU39750, BSU39720, BSU28760, BSU39700, BSU39710, BSU39740, BSU38730, BSU39730, BSU35090, BSU38740, BSU39760, BSU28770, BSU39670, BSU38750, BSU28790, BSU39680, BSU28780, BSU33960, BSU28800, BSU20850, BSU38760, BSU05880, BSU05870, BSU12330, BSU15100, BSU12340, BSU05830, BSU12320, BSU05840, BSU05850, BSU05860, BSU12380, BSU31180, BSU12350,…	araN, araP, araQ, pchR, iolH, abfA, iolB, iolE, araM, iolG, iolF, iolC, cydD, iolD, yvmA, cydC, iolA, araL, iolJ, cydB, araB, iolI, araD, araE, araA, aimP, cydA, gmuG, gmuF, yjmD, ylbP, uxuA, gmuC, yjmC, gmuD, gmuR, gmuE, uxaB, rhaA, yjmF, gmuA, gmuB, rhaB, uxaA, exuT, rhaM
SigB	SigB	0.414396	0.001056	0.006718	BSU04039, BSU00860, BSU04200, BSU04190, BSU00850, BSU33410, BSU07850, BSU39840, BSU04180, BSU02110, BSU00840, BSU00830, BSU28340, BSU09690, BSU12150, BSU27020, BSU13160, BSU07550, BSU05490, BSU10430, BSU00160, BSU04220, BSU13169, BSU04380, BSU38720, BSU39050, BSU02590, BSU03910, BSU33850, BSU04370, BSU30930, BSU04430, BSU34540, BSU00870, BSU08510, BSU23830, BSU08570, BSU23300, BSU00900, BSU31279,…	yczO, clpC, ydaE, ydaD, mcsB, yvgO, yfkM, yxbG, ydaC, ybyB, mcsA, ctsR, ysnF, nhaX, yjgB, yraA, ohrB, yflT, mhqO, yhxD, yaaH, ydaG, ykzN, ydaT, yxkO, katE, ycbP, gabD, yvbG, ydaS, ytaB, ydbD, clpP, radA, yfhF, yqjL, yfhK, ypuD, ispD, yuzH, gspA, ykzI, opuE, yyzH, ywlB, ydaP, yvzE, yybO, aldY, ytkL, yjzE, yxiS, yacL, guaD, yhcM, yycD, yqhB, yfkT, disA, yuzA, yjgD, gsiB, cypC, yerD, hpf, trxA, menC…
ImmR	ImmR	0.97775	0.001269	0.006718	BSU04940, BSU04870, BSU04910, BSU04880, BSU04930, BSU04900, BSU04860, BSU04950, BSU04890, BSU04920, BSU04840, BSU04830, BSU04980, BSU04970, BSU04839, BSU04850, BSU04960	conE, nicK, conB, ydcS, conD, yddA, ydcQ, yddF, ydcT, conC, ydcO, xis, yddI, cwlT, ydzL, ydcP, conG
IolR	IolR	0.79798	0.0013495	0.006718	BSU39690, BSU39750, BSU39720, BSU39700, BSU39710, BSU39740, BSU39730, BSU39760, BSU39670, BSU39680, BSU06230, BSU39770, BSU39780	iolH, iolB, iolE, iolG, iolF, iolC, iolD, iolA, iolJ, iolI, iolT, iolR, iolS
AraR	AraR	0.881309	0.0013755	0.006718	BSU28750, BSU28740, BSU28730, BSU28720, BSU28760, BSU28770, BSU28790, BSU28780, BSU33960, BSU28800	araN, araP, araQ, abfA, araM, araL, araB, araD, araE, araA
CsoR	CsoR	0.81242	0.0013831	0.006718	BSU19930, BSU19920, BSU19940, BSU19890, BSU19970, BSU19870, BSU19850, BSU19830, BSU19880, BSU19910, BSU19820	yotC, yotD, yotB, yotG, yosX, yotI, yotK, yotM, yotH, yotE, sprB
SigE	SigE	0.440403	0.0022075	0.0091582	BSU19930, BSU19920, BSU19940, BSU19890, BSU19970, BSU06910, BSU19870, BSU19850, BSU19830, BSU19880, BSU19910, BSU19820, BSU12330, BSU06900, BSU12340, BSU12320, BSU12380, BSU12350, BSU00160, BSU12390, BSU12360, BSU09780, BSU36040, BSU30970, BSU09770, BSU27840, BSU30950, BSU27980, BSU31279, BSU36750, BSU06890, BSU08920, BSU27970, BSU19900, BSU30960, BSU24140, BSU24400, BSU37870	yotC, yotD, yotB, yotG, yosX, cotJC, yotI, yotK, yotM, yotH, yotE, sprB, yjmD, cotJB, uxuA, yjmC, uxaB, yjmF, yaaH, uxaA, exuT, yheC, ywrJ, glgC, yheD, safA, glgA, spoIVFA, yuzH, spoIID, cotJA, yhbB, spoIVFB, yotF, glgD, mmgD, spoIIIAD, spsE
SigK	SigK	0.516364	0.0024242	0.0091582	BSU19930, BSU19920, BSU19940, BSU19890, BSU19970, BSU19870, BSU19850, BSU19830, BSU19880, BSU19910, BSU10920, BSU19820	yotC, yotD, yotB, yotG, yosX, yotI, yotK, yotM, yotH, yotE, yitA, sprB
T-box	T-box	-0.637375	0.0041494	0.0141079	BSU27380, BSU02530, BSU27410, BSU27550, BSU28630, BSU02540, BSU13120, BSU34010, BSU15430, BSU27560, BSU13130, BSU28080, BSU28640, BSU28090, BSU29670	yrzB, rtpA, alaS, aspS, pheT, ycbK, proB, yvbW, ileS, hisS, proA, folC, pheS, valS, tyrS
stringent response	stringent response	-0.559695	0.0050761	0.0156502	BSU15930, BSU01100, BSU16520, BSU24320, BSU28230, BSU24310, BSU01040, BSU15070, BSU16510, BSU36410, BSU14780, BSU14770, BSU36840, BSU36850, BSU13910, BSU36870, BSU36880, BSU36860, BSU13890	rnc, rpsL, frr, nusB, tig, folD, rplJ, ylbN, pyrH, mbl, ylaH, ylaG, atpH, atpF, ptsI, atpB, atpI, atpE, ptsG
Spo0A	Spo0A	-0.352903	0.0056497	0.0156502	BSU17910, BSU23470, BSU14120, BSU12850, BSU12840, BSU15370, BSU06580, BSU14110, BSU14100, BSU19210, BSU10750, BSU06570, BSU09420	yneF, spoIIAA, abbA, ykaA, pit, ylmD, yerC, ykuK, ykuJ, yocH, yisK, yerB, lytE
SigW	SigW	-0.321426	0.006135	0.0156502	BSU06210, BSU19290, BSU11330, BSU38270, BSU29530, BSU04590, BSU06270, BSU18580, BSU35130, BSU14370, BSU18980, BSU14360, BSU12420, BSU14350, BSU06180, BSU06190, BSU06200, BSU04600, BSU18590	ydjI, yozO, fabHA, efeO, sppA, ydbS, ydjO, yoaF, yvlA, yknZ, yobJ, yknY, yjoB, yknX, pspA, ydjG, ydjH, ydbT, yoaG
Fur	Fur	-0.47234	0.0067568	0.0156502	BSU38270, BSU03800, BSU01610, BSU04470, BSU32940, BSU01600, BSU01640, BSU33290, BSU10330, BSU08450, BSU04530, BSU31970, BSU32000, BSU32010, BSU31980, BSU14160, BSU33300, BSU14150, BSU33310, BSU39610, BSU08440, BSU07520, BSU33320, BSU14170	efeO, fpbN, feuC, dctP, yusV, ybbA, btr, fhuC, yhfQ, yfiZ, fbpB, dhbB, dhbA, besA, dhbE, ykuO, fhuG, ykuN, fhuB, yxeB, yfiY, fecC, fhuD, ykuP
SigF	SigF	0.45145	0.0069045	0.0156502	BSU38730, BSU00860, BSU38740, BSU38750, BSU38760, BSU00850, BSU00840, BSU37510, BSU00830, BSU25790, BSU33060, BSU26620, BSU25800, BSU00240, BSU25780, BSU00870, BSU08510, BSU24580, BSU33070, BSU33050, BSU25810, BSU24650, BSU36550, BSU00560, BSU28210, BSU09140	cydD, clpC, cydC, cydB, cydA, mcsB, mcsA, pbpG, ctsR, arsB, gerAB, yrdR, yqcK, csfB, arsC, radA, yfhF, yqhH, gerAC, gerAA, arsR, yqzG, spoIIQ, spoVT, lonB, yhcM
SigI	SigI	-0.444438	0.0076628	0.0162602	BSU32000, BSU31980, BSU14160, BSU14150, BSU09420, BSU14170	dhbA, dhbE, ykuO, ykuN, lytE, ykuP
SigD	SigD	-0.526134	0.0081301	0.0162602	BSU11940, BSU35400, BSU35330, BSU13950, BSU11910, BSU35360, BSU35860, BSU11950, BSU35319, BSU13420, BSU28890, BSU35350, BSU31240, BSU19750, BSU09370, BSU19760, BSU35230, BSU13680, BSU19410, BSU36390, BSU14010, BSU38800, BSU13690, BSU33870, BSU38850, BSU36400, BSU10380	yjcP, flgL, fliS, mcpC, yjcM, hag, pgdS, yjcQ, smiA, dgcW, yscB, yvyC, mcpA, cgeE, lytF, cgeD, swrA, motB, cwlS, flhP, cheV, yxkH, motA, yvbI, yxkC, flhO, hemAT

## Sheet: wild type 37 °C vs. 4853 °C
wild type 37 °C vs. Wild type 48/53 °C
enriched categories	Description	enrichmentScore	pvalue	p.adjust	enriched genes	gene names
SW 4.1.1.2	Flagellar proteins	-0.534954	0.0015924	0.0058651	BSU35410, BSU16360, BSU16400, BSU16310, BSU16370, BSU16380, BSU16350, BSU35320, BSU16320, BSU16340, BSU16300, BSU16390, BSU35340, BSU36390, BSU36400, BSU35330, BSU13690, BSU13680, BSU35360	flgK, fliQ, flhF, fliM, fliR, flhB, fliP, fliT, fliY, fliZ, fliL, flhA, fliD, flhP, flhO, fliS, motA, motB, hag
SW 3.3.1.4	Ribosomal proteins	-0.688257	0.0016103	0.0058651	BSU01110, BSU01150, BSU01420, BSU01100, BSU01160, BSU01170, BSU01410, BSU01050, BSU01180, BSU01440, BSU01210, BSU01190, BSU01230, BSU01040, BSU01340, BSU01220, BSU01260, BSU01200, BSU01240, BSU01350, BSU01290, BSU01300, BSU01330, BSU01280, BSU01320, BSU01250, BSU01270, BSU01310	rpsG, rpsJ, rpsK, rpsL, rplC, rplD, rpsM, rplL, rplW, rplQ, rplV, rplB, rplP, rplJ, rpmD, rpsC, rplN, rpsS, rpmC, rplO, rpsN, rpsH, rpsE, rplE, rplR, rpsQ, rplX, rplF
SW 1.2.1.1.1	Uptake of carbon sources	-0.639225	0.0017825	0.0058651	BSU38810, BSU35940, BSU35960, BSU35950, BSU35930	msmX, rbsA, rbsB, rbsC, rbsD
SW 1.2.2.2	Sugar specific PTS proteins	-0.859395	0.0017825	0.0058651	BSU07800, BSU27060, BSU38050, BSU38570, BSU38580, BSU38590, BSU39270, BSU13890, BSU12010	treP, levE, sacP, licA, licC, licB, bglP, ptsG, manP
SW 4.2.1.4	Sporulation proteins, other	0.512367	0.0026042	0.0058651	BSU33540, BSU26390, BSU10920, BSU24150, BSU37510, BSU09140, BSU10910, BSU00860, BSU18030, BSU31380, BSU36040, BSU07920, BSU27830, BSU12380, BSU37620, BSU18720, BSU09180, BSU12390, BSU40950, BSU25520, BSU11410, BSU24400, BSU00850, BSU03920, BSU36540, BSU24130, BSU15030	azoR2, sigKC, yitA, mmgC, pbpG, yhcM, yisZ, clpC, tlp, yuzA, ywrJ, chaA, coxA, uxaB, rsfA, yoaR, yhcQ, uxaA, yyaC, yqxA, yjbA, spoIIIAD, mcsB, glcU, ywnJ, mmgE, spoVV
SW 4.3.8	Resistance against oxidative and electrophile stress	0.564177	0.0026042	0.0058651	BSU23820, BSU13160, BSU19560, BSU19570, BSU33540, BSU07850, BSU12870, BSU27020, BSU23830, BSU39050, BSU02100, BSU21680, BSU24750, BSU38110, BSU13170, BSU07750, BSU12170, BSU09530, BSU06590, BSU31280, BSU21690, BSU04220, BSU38830, BSU39040, BSU28500, BSU14230, BSU08500, BSU34790	yqjM, ohrB, mhqD, mhqE, azoR2, yfkM, mhqA, yraA, yqjL, katE, cypC, msrB, yqhB, nfrA, guaD, yflA, yjgD, yhdN, yerD, yugU, msrA, ydaG, aldY, yxiS, trxA, ahpT, yfhE, trxB
SW 4.2.1.5	Newly identified sporulation proteins (based on transcription profiling)	0.572562	0.0026316	0.0058651	BSU14460, BSU32320, BSU31310, BSU30710, BSU11549, BSU13050, BSU10600, BSU31300, BSU36030, BSU19280, BSU32950, BSU32850, BSU07250, BSU31810, BSU19270, BSU40460, BSU19680, BSU30850, BSU18760	ykpC, yutC, yugP, ythA, yizD, ykzH, yhjQ, yugS, ywrK, yocN, yusW, fadM, yetO, yuzE, yozN, yyzB, yozE, ytdA, yoaU
SW 4.3.1	General stress proteins (controlled by SigB)	0.61772	0.0029326	0.0058651	BSU12150, BSU04200, BSU04190, BSU33410, BSU28340, BSU13160, BSU39840, BSU07550, BSU07850, BSU04430, BSU09450, BSU03910, BSU10430, BSU27020, BSU23830, BSU38430, BSU39050, BSU02110, BSU40450, BSU04380, BSU38720, BSU02100, BSU00160, BSU24750, BSU23300, BSU09140, BSU04400, BSU09690, BSU12160, BSU04370, BSU36670, BSU06660, BSU00860, BSU13170, BSU08510, BSU07750, BSU12170, BSU31380, BSU07920, BSU09530,…	yjgB, ydaE, ydaD, yvgO, ysnF, ohrB, yxbG, yflT, yfkM, ydbD, yhdF, gabD, yhxD, yraA, yqjL, gspA, katE, ybyB, yycD, ydaT, yxkO, cypC, yaaH, yqhB, ypuD, yhcM, gsiB, nhaX, yjgC, ydaS, csbD, opuE, clpC, guaD, yfhF, yflA, yjgD, yuzA, chaA, yhdN, yerD, ydaP, yugU, ykzI, ydaG, ycdG, ycdF, clpP, yfhK, ytkL, yaaI, aldY, yxiS, yfkD, trxA, ywtG, yfhE, yocB, ykgA, yjzE, mcsB, corA, ywzA
SW 4.3.4	Heat shock proteins	0.593839	0.0044944	0.00799	BSU13700, BSU14470, BSU39820, BSU00860, BSU06030, BSU34540, BSU06020, BSU13460, BSU00850, BSU13450	clpE, mreBH, htpG, clpC, groEL, clpP, groES, rsgI, mcsB, sigI
SW 4.3.2	Cell envelope stress proteins (controlled by SigM, V, W, X, Y)	0.492621	0.0071259	0.0114014	BSU23830, BSU27180, BSU23300, BSU04230, BSU06380, BSU09520, BSU09510, BSU36540, BSU09500, BSU27160, BSU38480, BSU22980	yqjL, yrhH, ypuD, amj, yebC, sigM, yhdL, ywnJ, yhdK, yrhJ, sasA, ypbG
enriched regulons	Description	enrichmentScore	pvalue	p.adjust	enriched genes	gene names
SigA	SigA	-0.384209	0.0012837	0.004603	BSU19180, BSU14150, BSU31959, BSU34370, BSU25190, BSU31960, BSU39520, BSU13570, BSU30280, BSU16340, BSU28710, BSU29690, BSU16300, BSU08100, BSU01630, BSU16390, BSU34360, BSU14170, BSU18440, BSU07810, BSU30460, BSU29700, BSU18450, BSU01400, BSU09290, BSU30410, BSU23550, BSU01150, BSU30440, BSU38030, BSU01420, BSU15880, BSU39250, BSU39410, BSU31990, BSU30450, BSU24640, BSU34190, BSU39340, BSU01160,…	des, ykuN, ybdZ, epsA, cccA, dhbF, yxeK, mtnU, melD, fliZ, cstA, acuA, fliL, acoR, feuA, flhA, epsB, ykuP, gltB, treA, ytrA, acuB, gltA, rpmJ, glpK, ytrF, mleA, rpsJ, ytrC, ywdA, rpsK, fapR, yxiE, nupC, dhbC, ytrB, tapA, lutP, hutP, rplC, dhbE, sacA, treP, pdp, infA, melE, rplD, mleN, srfAD, rpsM, wapI, rpoA, dhbA, pyrG, dhbB, bglS, melR, rplW, srfAC, rplQ, ald, wapA, rplV, ybzG, sacP, rplB, adk,…
CcpA	CcpA	-0.55431	0.001497	0.004603	BSU28710, BSU29690, BSU08100, BSU07810, BSU29700, BSU09290, BSU23550, BSU38030, BSU39250, BSU39410, BSU39340, BSU07560, BSU38040, BSU07800, BSU39400, BSU30270, BSU27060, BSU23560, BSU06950, BSU39070, BSU30260, BSU38810, BSU28900, BSU06940, BSU38050, BSU09280, BSU38570, BSU35920, BSU35910, BSU12000, BSU28910, BSU35940, BSU35960, BSU04470, BSU35950, BSU38580, BSU38560, BSU38590, BSU37790, BSU35930,…	cstA, acuA, acoR, treA, acuB, glpK, mleA, ywdA, yxiE, nupC, hutP, pel, sacA, treP, pdp, melE, levE, mleN, yesM, bglS, melR, msmX, pftB, yesL, sacP, glpF, licA, rbsK, rbsR, manR, pftA, rbsA, rbsB, dctP, rbsC, licC, licH, licB, rocG, rbsD, wprA, bglP, bglH, glpT, glpQ
stringent response	stringent response	-0.599006	0.0015528	0.004603	BSU15080, BSU28870, BSU36830, BSU_misc_RNA_3, BSU28860, BSU36810, BSU36850, BSU36840, BSU28840, BSU36800, BSU36820, BSU01400, BSU01110, BSU01120, BSU01150, BSU01420, BSU01100, BSU01160, BSU01480, BSU01390, BSU01170, BSU01410, BSU01430, BSU01050, BSU01180, BSU01440, BSU01210, BSU01389, BSU01190, BSU01370, BSU01360, BSU01230, BSU01040, BSU01340, BSU01220, BSU01260, BSU01200, BSU01240, BSU01380, BSU…	rpmF, infC, atpA, NA, rpmI, atpD, atpF, atpH, ysdA, atpC, atpG, rpmJ, rpsG, fusA, rpsJ, rpsK, rpsL, rplC, truA, infA, rplD, rpsM, rpoA, rplL, rplW, rplQ, rplV, ybzG, rplB, adk, secY, rplP, rplJ, rpmD, rpsC, rplN, rpsS, rpmC, map, rplO, rpsN, rpsH, rpsE, rplE, rplR, rpsQ, rplX, rplF, ptsG
SigD	SigD	-0.493249	0.0015576	0.004603	BSU16280, BSU16410, BSU12120, BSU31260, BSU11910, BSU35319, BSU35400, BSU16420, BSU31230, BSU16270, BSU16330, BSU35410, BSU16360, BSU16400, BSU16310, BSU16370, BSU33870, BSU13950, BSU16380, BSU35860, BSU03440, BSU16430, BSU14010, BSU16350, BSU35320, BSU16320, BSU16340, BSU16300, BSU13420, BSU16390, BSU21940, BSU38400, BSU35340, BSU35780, BSU09370, BSU36390, BSU38850, BSU36400, BSU35330, BSU07350,…	flgD, flhG, yjfB, mcpB, yjcM, smiA, flgL, cheB, tlpB, fliK, cheY, flgK, fliQ, flhF, fliM, fliR, yvbI, mcpC, flhB, pgdS, tlpC, cheA, cheV, fliP, fliT, fliY, fliZ, fliL, dgcW, flhA, degR, epr, fliD, lytD, lytF, flhP, yxkC, flhO, fliS, yfmT, yfmS, mcpA, motA, motB, yvyC, cgeD, hemAT, yscB, yxkH, hag
AbrB	AbrB	-0.493889	0.0015798	0.004603	BSU34370, BSU21440, BSU25190, BSU32010, BSU31960, BSU02700, BSU34360, BSU09290, BSU31990, BSU24640, BSU31980, BSU21450, BSU21530, BSU32000, BSU37770, BSU31970, BSU31240, BSU37780, BSU21540, BSU21460, BSU28890, BSU09280, BSU35920, BSU35910, BSU21470, BSU35940, BSU35960, BSU35950, BSU37790, BSU35930	epsA, bdbB, cccA, besA, dhbF, lip, epsB, glpK, dhbC, tapA, dhbE, yolJ, yolB, dhbA, rocB, dhbB, mcpA, rocA, yolA, bdbA, yscB, glpF, rbsK, rbsR, sunT, rbsA, rbsB, rbsC, rocG, rbsD
CodY	CodY	-0.418516	0.0016207	0.004603	BSU16280, BSU16410, BSU40330, BSU11430, BSU03220, BSU16420, BSU16270, BSU16330, BSU32730, BSU16360, BSU40320, BSU16400, BSU16310, BSU16370, BSU03770, BSU29600, BSU16380, BSU16430, BSU32750, BSU16350, BSU16320, BSU32740, BSU16340, BSU16300, BSU16390, BSU39340, BSU03520, BSU37770, BSU37780, BSU03510, BSU03490, BSU03480, BSU35360	flgD, flhG, rocE, oppA, putP, cheB, fliK, cheY, metQ, fliQ, rocF, flhF, fliM, fliR, rapC, braB, flhB, cheA, metN, fliP, fliY, metP, fliZ, fliL, flhA, hutP, srfAD, rocB, rocA, srfAC, srfAB, srfAA, hag
DegU	DegU	-0.52075	0.0016807	0.004603	BSU35900, BSU16460, BSU16280, BSU16410, BSU35400, BSU16420, BSU16270, BSU16330, BSU35410, BSU16360, BSU16400, BSU16310, BSU16370, BSU16380, BSU16430, BSU16350, BSU16320, BSU16340, BSU16300, BSU16390, BSU38400, BSU39220, BSU39230	capB, cheD, flgD, flhG, flgL, cheB, fliK, cheY, flgK, fliQ, flhF, fliM, fliR, flhB, cheA, fliP, fliY, fliZ, fliL, flhA, epr, wapI, wapA
Fur	Fur	-0.499005	0.0016807	0.004603	BSU38270, BSU33300, BSU07520, BSU33290, BSU01640, BSU01610, BSU14160, BSU33320, BSU01600, BSU14150, BSU31959, BSU32010, BSU31960, BSU08440, BSU01630, BSU14170, BSU18440, BSU18450, BSU31990, BSU31980, BSU39610, BSU32000, BSU31970, BSU04470	efeO, fhuG, fecC, fhuC, btr, feuC, ykuO, fhuD, ybbA, ykuN, ybdZ, besA, dhbF, yfiY, feuA, ykuP, gltB, gltA, dhbC, dhbE, yxeB, dhbA, dhbB, dctP
SwrA	SwrA	-0.537135	0.0017544	0.004603	BSU16280, BSU16410, BSU16420, BSU16270, BSU16330, BSU16360, BSU16400, BSU16310, BSU16370, BSU16380, BSU16430, BSU16350, BSU16320, BSU16340, BSU16300, BSU16390	flgD, flhG, cheB, fliK, cheY, fliQ, flhF, fliM, fliR, flhB, cheA, fliP, fliY, fliZ, fliL, flhA
ComA	ComA	-0.613671	0.0018083	0.004603	BSU03530, BSU15890, BSU15880, BSU34190, BSU07560, BSU03520, BSU03510, BSU03490, BSU03480	ycxA, plsX, fapR, lutP, pel, srfAD, srfAC, srfAB, srfAA
Kre	Kre	-0.715789	0.0018083	0.004603	BSU14150, BSU31959, BSU31960, BSU14170, BSU31990, BSU31980, BSU32000, BSU31970, BSU28900, BSU28910	ykuN, ybdZ, dhbF, ykuP, dhbC, dhbE, dhbA, dhbB, pftB, pftA
SigF	SigF	0.588204	0.0022989	0.0051527	BSU38760, BSU37510, BSU09140, BSU38750, BSU00860, BSU18030, BSU08510, BSU37620, BSU26620, BSU40950, BSU25520, BSU11410, BSU08500, BSU00850, BSU36540	cydA, pbpG, yhcM, cydB, clpC, tlp, yfhF, rsfA, yrdR, yyaC, yqxA, yjbA, yfhE, mcsB, ywnJ
SigG	SigG	0.599946	0.0023923	0.0051527	BSU33540, BSU32320, BSU37510, BSU09140, BSU18030, BSU08510, BSU31380, BSU07920, BSU09410, BSU37620, BSU18720, BSU26620, BSU09180, BSU07930, BSU03930, BSU08500, BSU03920	azoR2, yutC, pbpG, yhcM, tlp, yfhF, yuzA, chaA, phoA, rsfA, yoaR, yrdR, yhcQ, yfkD, gdh, yfhE, glcU
SigB	SigB	0.612064	0.002924	0.005848	BSU12150, BSU04200, BSU04190, BSU33410, BSU04039, BSU28340, BSU13160, BSU39840, BSU07550, BSU07850, BSU04430, BSU09450, BSU03910, BSU04180, BSU10430, BSU27020, BSU23830, BSU38430, BSU39050, BSU02110, BSU40450, BSU04380, BSU38720, BSU02100, BSU00160, BSU24750, BSU23300, BSU09140, BSU04400, BSU09690, BSU12160, BSU04370, BSU36670, BSU06660, BSU00860, BSU13170, BSU08510, BSU07750, BSU12170, BSU31380,…	yjgB, ydaE, ydaD, yvgO, yczO, ysnF, ohrB, yxbG, yflT, yfkM, ydbD, yhdF, gabD, ydaC, yhxD, yraA, yqjL, gspA, katE, ybyB, yycD, ydaT, yxkO, cypC, yaaH, yqhB, ypuD, yhcM, gsiB, nhaX, yjgC, ydaS, csbD, opuE, clpC, guaD, yfhF, yflA, yjgD, yuzA, chaA, yhdN, yerD, ydaP, yugU, yuzH, yyzH, ykzI, ydaG, ycdG, ycdF, clpP, yfhK, ytkL, yaaI, aldY, yxiS, yfkD, ykzN, trxA, ywtG, yfhE, yocB, ykgA, yjzE, mcsB, cor…
Spo0A	Spo0A	-0.396367	0.0033113	0.0058929	BSU07450, BSU12440, BSU16460, BSU16280, BSU16410, BSU00110, BSU40330, BSU00120, BSU03220, BSU16420, BSU06580, BSU06570, BSU16270, BSU16330, BSU16360, BSU40320, BSU16400, BSU16310, BSU16370, BSU16380, BSU16430, BSU16350, BSU16320, BSU16340, BSU16300, BSU16390, BSU38400	yfmJ, phrA, cheD, flgD, flhG, pdxS, rocE, pdxT, putP, cheB, yerC, yerB, fliK, cheY, fliQ, rocF, flhF, fliM, fliR, flhB, cheA, fliP, fliY, fliZ, fliL, flhA, epr
Xpf	Xpf	-0.525828	0.0035273	0.0058929	BSU12660, BSU12700, BSU12770, BSU12640, BSU12630, BSU12590, BSU12650, BSU12710, BSU12671, BSU12580, BSU12600, BSU12620, BSU12690, BSU12610, BSU12570	xkdM, xkdQ, xkdX, xkdJ, xkdI, xkdE, xkdK, xkdR, xkdN, xtmB, xkdF, xkdH, xkdP, xkdG, xtmA
Abh	Abh	-0.588014	0.0035778	0.0058929	BSU03520, BSU03510, BSU21460, BSU03490, BSU03480, BSU21470	srfAD, srfAC, bdbA, srfAB, srfAA, sunT
SigM	SigM	0.480055	0.0046296	0.0072016	BSU27020, BSU23830, BSU27180, BSU23300, BSU00860, BSU04230, BSU06380, BSU09520, BSU09510, BSU00850, BSU36540, BSU09500, BSU27160, BSU38480, BSU22980, BSU00830	yraA, yqjL, yrhH, ypuD, clpC, amj, yebC, sigM, yhdL, mcsB, ywnJ, yhdK, yrhJ, sasA, ypbG, ctsR
SigE	SigE	0.378075	0.007177	0.0105767	BSU09770, BSU26390, BSU09780, BSU00160, BSU24150, BSU10600, BSU36040, BSU27830, BSU31280, BSU12380, BSU31279, BSU12390, BSU25520, BSU24400, BSU12050, BSU19680, BSU24130, BSU15030, BSU23620, BSU36050, BSU25770, BSU27840, BSU06910	yheD, sigKC, yheC, yaaH, mmgC, yhjQ, ywrJ, coxA, yugU, uxaB, yuzH, uxaA, yqxA, spoIIIAD, yjdH, yozE, mmgE, spoVV, yqkF, cotB, spoIVCA, safA, cotJC
PhoP	PhoP	-0.445786	0.0194004	0.0271605	BSU03520, BSU03510, BSU03490, BSU03480, BSU02140, BSU02130	srfAD, srfAC, srfAB, srfAA, glpT, glpQ
SigV	SigV	0.50698	0.0277186	0.0369581	BSU23830, BSU27180, BSU24150, BSU31280, BSU31279, BSU06380, BSU27160, BSU24130, BSU38480	yqjL, yrhH, mmgC, yugU, yuzH, yebC, yrhJ, mmgE, sasA

## Sheet: wt 37 °C vs. (p)ppGpp0 37 °C
wild type 37 °C vs. (p)ppGpp0 37 °C
enriched categories	Description	enrichmentScore	pvalue	p.adjust	enriched genes	gene names
---
enriched regulons	Description	enrichmentScore	pvalue	p.adjust	enriched genes	gene names
SigA	SigA	0.412757	0.0421053	0.0421053	BSU15500, BSU15510, BSU19970, BSU39460, BSU15490, BSU36510, BSU39490, BSU15540, BSU24960, BSU15520, BSU31900, BSU15480, BSU39470, BSU39500	pyrC, pyrAA, yosX, yxeQ, pyrB, nrgA, yxeN, pyrD, pstBA, pyrAB, yukD, pyrP, sndB, yxeM

## Sheet: wt 37 °C vs. rel 37 °C
wild type 37 °C vs. Δrel 37 °C
enriched categories	Description	enrichmentScore	pvalue	p.adjust	enriched genes	gene names
SW 4.2.1.5	Newly identified sporulation proteins (based on transcription profiling)	0.594595	0.0016611	0.0044293	BSU13940, BSU18019, BSU19749, BSU12400, BSU21960, BSU02250, BSU13050, BSU10600, BSU00080, BSU08779, BSU19270, BSU19680, BSU32950	ykwB, ynzL, yoyG, yjnA, ypeQ, ybfJ, ykzH, yhjQ, yaaC, ygzC, yozN, yozE, yusW
SW 2.3.1.10	Biosynthesis, acquisition of methionine, S-adenosylmethionine	0.687152	0.0016807	0.0044293	BSU11880, BSU13180, BSU13550, BSU13580, BSU13560, BSU32260, BSU11870, BSU13610, BSU13620, BSU13570, BSU13590	metC, metE, mtnA, mtnE, mtnK, hom, metI, mtnB, mtnD, mtnU, mtnW
SW 2.3.1.12	Biosynthesis, acquisition of branched-chain amino acids	0.827934	0.0016807	0.0044293	BSU09460, BSU28290, BSU28300, BSU28310, BSU28260, BSU28250, BSU28280, BSU28270, BSU21870	bcaP, ilvC, ilvH, ilvB, leuC, leuD, leuA, leuB, ilvD
SW 1.2.1.1.3	Uptake of peptides	0.79766	0.0017036	0.0044293	BSU11360, BSU11381, BSU12930, BSU12940, BSU11382, BSU12950, BSU11400, BSU11370, BSU11390, BSU12960	appD, appA/1, dppB, dppC, appA/2, dppD, appC, appF, appB, dppE
SW 2.3.3.4	Utilization of peptides	0.74544	0.0017036	0.0044293	BSU11360, BSU12930, BSU12940, BSU12920, BSU12950, BSU11400, BSU11370, BSU11390, BSU12960	appD, dppB, dppC, dppA, dppD, appC, appF, appB, dppE
SW 1.2.2.2	Sugar specific PTS proteins	-0.880298	0.0024096	0.0049392	BSU38050, BSU05820, BSU38570, BSU38590, BSU38580, BSU40120, BSU05830, BSU05810, BSU12010	sacP, gmuA, licA, licB, licC, yyzE, gmuC, gmuB, manP
SW 1.2.1.1.1	Uptake of carbon sources	-0.453609	0.0026596	0.0049392	BSU38810, BSU34150, BSU30270, BSU34160, BSU35930, BSU35950, BSU35940, BSU35960	msmX, ganP, melE, ganS, rbsD, rbsC, rbsA, rbsB
SW 4.3.1	General stress proteins (controlled by SigB)	0.398379	0.0077399	0.0125774	BSU09390, BSU04430, BSU28340, BSU10430, BSU06660, BSU04370, BSU12150, BSU40450, BSU19150, BSU33410, BSU35310, BSU13170, BSU36720, BSU02590, BSU17240, BSU31380, BSU04400, BSU07850, BSU38930, BSU02110, BSU13160, BSU18510	ygxB, ydbD, ysnF, yhxD, opuE, ydaS, yjgB, yycD, yocB, yvgO, hpf, guaD, ywmE, ycbP, ymzB, yuzA, gsiB, yfkM, yxjJ, ybyB, ohrB, yoxC
enriched regulons	Description	enrichmentScore	pvalue	p.adjust	enriched genes	gene names
CodY	CodY	0.618775	0.0013369	0.0058431	BSU32610, BSU32600, BSU09460, BSU28290, BSU28300, BSU28310, BSU28260, BSU28250, BSU32090, BSU32590, BSU11360, BSU28280, BSU28270, BSU32580, BSU11381, BSU12930, BSU06310, BSU10450, BSU12940, BSU10460, BSU31540, BSU21870, BSU12920, BSU17160, BSU32240, BSU11382, BSU17140, BSU12950, BSU32260, BSU32250, BSU11400, BSU37680, BSU17150, BSU03200, BSU11370, BSU11390, BSU03010, BSU21770, BSU36660, BSU31570,…	frlB, frlO, bcaP, ilvC, ilvH, ilvB, leuC, leuD, yuiA, frlN, appD, leuA, leuB, frlM, appA/1, dppB, gabP, yhjB, dppC, yhjC, nupN, ilvD, dppA, pksH, thrB, appA/2, pksF, dppD, hom, thrC, appC, bacG, pksG, putB, appF, appB, amhX, ilvA, ureA, nupQ, dppE, bacA, aprE, nupP, rocC, frlD, pksI, thrD, argJ, pksE, nupO, ycgA, mpr, ywaA
TnrA	TnrA	0.713891	0.0015385	0.0058431	BSU28290, BSU28300, BSU28310, BSU28260, BSU28250, BSU32090, BSU19579, BSU11360, BSU28280, BSU28270, BSU19580, BSU11381, BSU06310, BSU32240, BSU11382, BSU32260, BSU32250, BSU18450, BSU18440, BSU11400, BSU11370, BSU11390, BSU36660	ilvC, ilvH, ilvB, leuC, leuD, yuiA, yoyD, appD, leuA, leuB, yodF, appA/1, gabP, thrB, appA/2, hom, thrC, gltA, gltB, appC, appF, appB, ureA
S-box	S-box	0.604728	0.0015748	0.0058431	BSU11880, BSU13180, BSU38960, BSU13550, BSU11010, BSU13560, BSU11870, BSU15580, BSU15590, BSU13610, BSU15570, BSU15610, BSU13620, BSU15600, BSU13590, BSU18550, BSU18540, BSU18560, BSU38950	metC, metE, yxjG, mtnA, yitJ, mtnK, metI, cysP, sat, mtnB, cysH, ylnD, mtnD, cysC, mtnW, yoaC, yoaB, yoaD, yxjH
ScoC	ScoC	0.677214	0.0016694	0.0058431	BSU11360, BSU11381, BSU11382, BSU11400, BSU11370, BSU11390, BSU37740, BSU10300	appD, appA/1, appA/2, appC, appF, appB, bacA, aprE
stringent response	stringent response	-0.610766	0.0024814	0.0063234	BSU01430, BSU01200, BSU01320, BSU01270, BSU01250, BSU01410, BSU01100, BSU13890, BSU01380, BSU01310	rpoA, rpsS, rplR, rplX, rpsQ, rpsM, rpsL, ptsG, map, rplF
Xpf	Xpf	-0.659095	0.00271	0.0063234	BSU12590, BSU12680, BSU12700, BSU12750, BSU12720, BSU12630, BSU12620, BSU12770, BSU12730, BSU12580, BSU12710, BSU12610, BSU12570, BSU12760, BSU12690, BSU12600, BSU12671	xkdE, xkdO, xkdQ, xkdV, xkdS, xkdI, xkdH, xkdX, xkdT, xtmB, xkdR, xkdG, xtmA, xkdW, xkdP, xkdF, xkdN
AbrB	AbrB	-0.349121	0.0031646	0.0063291	BSU40050, BSU14350, BSU24640, BSU09290, BSU05860, BSU05820, BSU05870, BSU09280, BSU40060, BSU05840, BSU35920, BSU05830, BSU35910, BSU05810, BSU35930, BSU35950, BSU35940, BSU35960	gntR, yknX, tapA, glpK, gmuE, gmuA, gmuF, glpF, gntK, gmuD, rbsK, gmuC, rbsR, gmuB, rbsD, rbsC, rbsA, rbsB
CcpA	CcpA	-0.592296	0.003876	0.0067829	BSU39730, BSU28780, BSU38030, BSU23550, BSU39420, BSU06960, BSU28790, BSU08110, BSU39700, BSU25190, BSU40050, BSU31180, BSU34120, BSU09290, BSU28910, BSU23560, BSU05860, BSU28900, BSU39740, BSU39410, BSU39400, BSU14130, BSU28810, BSU38990, BSU38040, BSU08100, BSU34140, BSU30280, BSU07560, BSU06950, BSU39270, BSU38810, BSU34150, BSU38050, BSU31220, BSU12310, BSU39250, BSU05820, BSU28760, BSU05870,…	iolD, araD, ywdA, mleA, dra, yesN, araB, sspH, iolG, cccA, gntR, rhaA, ganB, glpK, pftA, mleN, gmuE, pftB, iolC, nupC, pdp, darB, abnA, scoA, sacA, acoR, ganQ, melD, pel, yesM, bglP, msmX, ganP, sacP, rhaEW, yjmB, yxiE, gmuA, araM, gmuF, glpF, melE, glpT, licA, rhaM, gntK, melR, bglH, ganS, licB, uxaC, glpQ, licH, licC, gmuD, rbsK, gmuC, rbsR, gmuB, manR, rbsD, rbsC, rbsA, rbsB
SigA	SigA	-0.305511	0.0060241	0.0093708	BSU39730, BSU28780, BSU38030, BSU06020, BSU23550, BSU39420, BSU37180, BSU30460, BSU28790, BSU03480, BSU13890, BSU31980, BSU23580, BSU08110, BSU01380, BSU03510, BSU03350, BSU39700, BSU25190, BSU40050, BSU03490, BSU01310, BSU23570, BSU31180, BSU34120, BSU24640, BSU09290, BSU23560, BSU05860, BSU39740, BSU39410, BSU39400, BSU28810, BSU38040, BSU08100, BSU34140, BSU30280, BSU39270, BSU34150, BSU38050,…	iolD, araD, ywdA, groES, mleA, dra, fadF, ytrA, araB, srfAA, ptsG, dhbE, ansA, sspH, map, srfAC, yciB, iolG, cccA, gntR, srfAB, rplF, ansB, rhaA, ganB, tapA, glpK, mleN, gmuE, iolC, nupC, pdp, abnA, sacA, acoR, ganQ, melD, bglP, ganP, sacP, rhaEW, yjmB, yxiE, gmuA, araM, gmuF, glpF, melE, glpT, licA, rhaM, gntK, melR, bglH, ganS, licB, uxaC, glpQ, licH, licC, gmuD, rbsK, gmuC, rbsR, gmuB, manR, y…
SigW	SigW	-0.561077	0.0074442	0.0104218	BSU29530, BSU02320, BSU38270, BSU06200, BSU12420, BSU25390, BSU06180, BSU35130, BSU06190, BSU14350	sppA, ybfP, efeO, ydjH, yjoB, yqeZ, pspA, yvlA, ydjG, yknX
SigB	SigB	0.337261	0.02118	0.0269564	BSU09390, BSU04430, BSU28340, BSU10430, BSU06660, BSU04370, BSU12150, BSU40450, BSU19150, BSU33410, BSU35310, BSU13170, BSU36720, BSU02590, BSU17240, BSU31380, BSU04400, BSU07850, BSU38930, BSU13169, BSU02110, BSU13160, BSU18510, BSU12210, BSU12160, BSU04039, BSU38610, BSU38830, BSU23329, BSU04200, BSU12170	ygxB, ydbD, ysnF, yhxD, opuE, ydaS, yjgB, yycD, yocB, yvgO, hpf, guaD, ywmE, ycbP, ymzB, yuzA, gsiB, yfkM, yxjJ, ykzN, ybyB, ohrB, yoxC, yjiB, yjgC, yczO, yxzF, aldY, ypuC/1, ydaE, yjgD

## Sheet: ppGpp0 37 °C vs. ppGpp0 48 °C
(p)ppGpp0 37 °C vs. (p)ppGpp0 48 °C
enriched categories	Description	enrichmentScore	pvalue	p.adjust	enriched genes	gene names
SW 4.3.1	General stress proteins (controlled by SigB)	0.63675	0.0024155	0.0072464	BSU02110, BSU04190, BSU04200, BSU10430, BSU12150, BSU04430, BSU07550, BSU07850, BSU04380, BSU34540, BSU04370, BSU13160, BSU33410, BSU40450, BSU31380, BSU28340, BSU38720, BSU27020, BSU17240, BSU39840, BSU23830, BSU03910, BSU04220, BSU06590, BSU00860, BSU09140	ybyB, ydaD, ydaE, yhxD, yjgB, ydbD, yflT, yfkM, ydaT, clpP, ydaS, ohrB, yvgO, yycD, yuzA, ysnF, yxkO, yraA, ymzB, yxbG, yqjL, gabD, ydaG, yerD, clpC, yhcM
SW 4.3.8	Resistance against oxidative and electrophile stress	0.503493	0.0175055	0.0184843	BSU23820, BSU07850, BSU13160, BSU19560, BSU19570, BSU27020, BSU23830, BSU04220, BSU06590	yqjM, yfkM, ohrB, mhqD, mhqE, yraA, yqjL, ydaG, yerD
SW 3.3.1.4	Ribosomal proteins	-0.479381	0.0184843	0.0184843	BSU01350, BSU01400, BSU01300, BSU01330, BSU01280, BSU01440, BSU01410, BSU01270, BSU01250, BSU01290, BSU01310, BSU01320	rplO, rpmJ, rpsH, rpsE, rplE, rplQ, rpsM, rplX, rpsQ, rpsN, rplF, rplR
enriched regulons	Description	enrichmentScore	pvalue	p.adjust	enriched genes	gene names
stringent response	stringent response	-0.486486	0.0017483	0.0038052	BSU01360, BSU01240, BSU01350, BSU01370, BSU01430, BSU01400, BSU01300, BSU01389, BSU01330, BSU01280, BSU01440, BSU01410, BSU01480, BSU01270, BSU28840, BSU01250, BSU01290, BSU01310, BSU01320, BSU01380, BSU13890	secY, rpmC, rplO, adk, rpoA, rpmJ, rpsH, ybzG, rpsE, rplE, rplQ, rpsM, truA, rplX, ysdA, rpsQ, rpsN, rplF, rplR, map, ptsG
CymR	CymR	-0.763251	0.0018215	0.0038052	BSU29400, BSU15600, BSU09130, BSU15590, BSU39470, BSU39460, BSU39480, BSU39510, BSU39490, BSU39520, BSU39500	ascR, cysC, tcyP, sat, sndB, yxeQ, yxeO, snaB, yxeN, yxeK, yxeM
SigB	SigB	0.618865	0.0022831	0.0038052	BSU02110, BSU04190, BSU04200, BSU10430, BSU12150, BSU04430, BSU07550, BSU07850, BSU04380, BSU34540, BSU04370, BSU13160, BSU33410, BSU40450, BSU31380, BSU28340, BSU38720, BSU27020, BSU17240, BSU39840, BSU23830, BSU03910, BSU04180, BSU04220, BSU06590, BSU00860, BSU09140	ybyB, ydaD, ydaE, yhxD, yjgB, ydbD, yflT, yfkM, ydaT, clpP, ydaS, ohrB, yvgO, yycD, yuzA, ysnF, yxkO, yraA, ymzB, yxbG, yqjL, gabD, ydaC, ydaG, yerD, clpC, yhcM

## Sheet: rel 37 °C vs. rel 48 °C
Δrel 37 °C vs. Δrel 48 °C
enriched categories	Description	enrichmentScore	pvalue	p.adjust	enriched genes	gene names
SW 4.3.1	General stress proteins (controlled by SigB)	0.592105	0.001912	0.001912	BSU09690, BSU24000, BSU13020, BSU24740, BSU14660, BSU37210, BSU37240, BSU11839, BSU08510, BSU24750, BSU30930, BSU12150, BSU39840
enriched regulons	Description	enrichmentScore	pvalue	p.adjust	enriched genes	gene names
SigB	SigB	0.6	0.0017182	0.00489	BSU09690, BSU24000, BSU06400, BSU13020, BSU24740, BSU14660, BSU37210, BSU37240, BSU11839, BSU08510, BSU24750, BSU30930, BSU12150, BSU39840
CodY	CodY	-0.652174	0.002445	0.00489	BSU32570, BSU10450, BSU31560, BSU10460, BSU28290, BSU32600, BSU28270, BSU28280, BSU03010, BSU28250, BSU28260, BSU32590, BSU17170, BSU32610, BSU31540, BSU32580, BSU17150, BSU17140, BSU09460

## Sheet: (p)ppGpp0 37 °C vs. rel 37 °C
(p)ppGpp0 37 °C vs. Δrel 37 °C
enriched categories	Description	enrichmentScore	pvalue	p.adjust	enriched genes	gene names
SW 4.3.1	General stress proteins (controlled by SigB)	0.44927	0.001261	0.0063623	BSU09390, BSU10430, BSU31380, BSU35310, BSU40450, BSU28340, BSU04370, BSU02110, BSU04430, BSU19150, BSU17240, BSU06660, BSU38930, BSU33410, BSU12150, BSU02590, BSU04400, BSU09140, BSU07850, BSU13160, BSU04380, BSU38610, BSU18510, BSU38830, BSU13170, BSU07550, BSU06590, BSU12170, BSU36720, BSU36670, BSU08570, BSU38430, BSU09530, BSU02100, BSU12160, BSU31280, BSU18530, BSU24750, BSU36680, BSU09690,…
SW 1.2.1.1.3	Uptake of peptides	0.63521	0.0014472	0.0063623	BSU11370, BSU11381, BSU11382, BSU11360, BSU12940, BSU12930, BSU12950, BSU11400, BSU11390, BSU12960, BSU11460, BSU11470, BSU11450
SW 2.3.1.10	Biosynthesis, acquisition of methionine, S-adenosylmethionine	0.873134	0.001497	0.0063623	BSU11880, BSU13580, BSU13550, BSU13560, BSU11870, BSU13180, BSU32260, BSU13620, BSU13590, BSU13570, BSU13610, BSU13600
SW 2.3.1.12	Biosynthesis, acquisition of branched-chain amino acids	0.84223	0.001497	0.0063623	BSU28310, BSU09460, BSU28300, BSU28280, BSU28290, BSU28270, BSU28250, BSU21870, BSU28260, BSU21770
SW 3.3.1.4	Ribosomal proteins	-0.611872	0.0035336	0.0120141	BSU01420, BSU01340, BSU01150, BSU01350, BSU01330, BSU01160, BSU01210, BSU01190, BSU01400, BSU01180, BSU01220, BSU01410, BSU01170, BSU01320, BSU01300, BSU01230, BSU01200, BSU01290, BSU01310, BSU01240, BSU01260, BSU01280, BSU01270, BSU01250
SW 2.3.3.4	Utilization of peptides	0.579737	0.0043415	0.012301	BSU11370, BSU12920, BSU11360, BSU12940, BSU12930, BSU12950, BSU11400, BSU11390, BSU12960, BSU11460, BSU11470, BSU11450
SW 4.3.2	Cell envelope stress proteins (controlled by SigM, V, W, X, Y)	-0.604167	0.0056818	0.0137987	BSU25370, BSU38940, BSU14350, BSU16950, BSU29530, BSU06290, BSU06180, BSU27120, BSU17840
SW 1.2.1.1.1	Uptake of carbon sources	-0.384629	0.0201342	0.0427852	BSU30270, BSU34600, BSU34150, BSU34160, BSU35930, BSU35950, BSU35940, BSU35960
enriched regulons	Description	enrichmentScore	pvalue	p.adjust	enriched genes	gene names
CodY	CodY	0.593716	0.0011468	0.0081909	BSU28310, BSU09460, BSU32610, BSU28300, BSU28280, BSU28290, BSU32600, BSU32580, BSU28270, BSU28250, BSU21870, BSU28260, BSU32590, BSU06310, BSU10450, BSU11370, BSU17140, BSU12920, BSU37680, BSU17160, BSU11381, BSU32090, BSU10460, BSU11382, BSU31540, BSU32240, BSU11360, BSU32250, BSU12940, BSU12930, BSU21770, BSU32260, BSU36660, BSU03200, BSU12950, BSU03010, BSU10300, BSU11400, BSU03790, BSU11390,…
SigB	SigB	0.400767	0.001224	0.0081909	BSU09390, BSU10430, BSU31380, BSU35310, BSU40450, BSU28340, BSU04370, BSU02110, BSU04430, BSU19150, BSU17240, BSU06660, BSU38930, BSU33410, BSU12210, BSU12150, BSU02590, BSU04400, BSU09140, BSU07850, BSU13160, BSU17250, BSU04380, BSU38610, BSU18510, BSU38830, BSU13170, BSU04039, BSU07550, BSU06590, BSU12170, BSU36720, BSU36670, BSU08570, BSU12220, BSU38430, BSU09530, BSU02100, BSU12160, BSU31280,…
TnrA	TnrA	0.666637	0.0013459	0.0081909	BSU19579, BSU28310, BSU28300, BSU28280, BSU28290, BSU28270, BSU28250, BSU19580, BSU28260, BSU06310, BSU11370, BSU11381, BSU32090, BSU11382, BSU32240, BSU11360, BSU32250, BSU32260, BSU36660, BSU11400, BSU11390, BSU36650
S-box	S-box	0.648823	0.0014245	0.0081909	BSU11880, BSU13550, BSU13560, BSU11870, BSU13180, BSU38960, BSU11010, BSU13620, BSU13590, BSU13610, BSU13600, BSU18550, BSU18560, BSU15570, BSU18540, BSU15580
Xpf	Xpf	-0.845459	0.0034843	0.0126838	BSU12740, BSU12660, BSU12770, BSU12650, BSU12780, BSU12720, BSU12630, BSU12610, BSU12760, BSU12590, BSU12700, BSU12620, BSU12680, BSU12749, BSU12730, BSU12600, BSU12710, BSU12750, BSU12570, BSU12690, BSU12671, BSU12580
stringent response	stringent response	-0.605581	0.0038911	0.0126838	BSU01340, BSU01430, BSU01150, BSU01360, BSU23220, BSU01350, BSU01480, BSU01330, BSU01370, BSU23210, BSU14580, BSU01390, BSU01160, BSU01210, BSU01190, BSU14590, BSU01400, BSU01180, BSU01220, BSU01389, BSU01410, BSU01170, BSU01320, BSU01300, BSU01230, BSU01200, BSU01290, BSU01310, BSU01240, BSU01260, BSU01280, BSU01380, BSU01270, BSU01250
ScoC	ScoC	0.497612	0.0044118	0.0126838	BSU11370, BSU11381, BSU11382, BSU11360, BSU10300, BSU11400, BSU11390, BSU37740, BSU11460, BSU11470, BSU38400, BSU11450, BSU35360, BSU11440
SigD	SigD	0.513095	0.0044118	0.0126838	BSU12120, BSU35310, BSU35860, BSU19760, BSU15960, BSU07350, BSU07360, BSU11570, BSU19749, BSU19750, BSU38400, BSU14010, BSU21940, BSU35360, BSU13420, BSU13950
AbrB	AbrB	-0.278413	0.0053763	0.0137395	BSU05870, BSU05810, BSU35910, BSU35920, BSU05840, BSU05830, BSU35930, BSU35950, BSU35940, BSU35960
CcpA	CcpA	-0.478662	0.0064103	0.0147436	BSU23550, BSU28790, BSU08100, BSU09280, BSU28900, BSU31220, BSU39700, BSU39410, BSU28810, BSU38990, BSU38590, BSU40060, BSU14130, BSU30270, BSU34120, BSU07560, BSU31190, BSU39270, BSU34140, BSU38570, BSU23560, BSU05850, BSU28910, BSU30260, BSU39250, BSU05880, BSU38580, BSU38560, BSU28760, BSU05860, BSU34150, BSU12310, BSU39260, BSU34160, BSU05820, BSU02140, BSU02130, BSU05870, BSU05810, BSU35910,…
YlxR	YlxR	0.503387	0.009375	0.0184887	BSU32610, BSU32600, BSU32580, BSU32590, BSU32570, BSU11220, BSU11190, BSU33800, BSU11200, BSU33820, BSU33830, BSU32550, BSU33810
AhrC	AhrC	0.593135	0.0096463	0.0184887	BSU37760, BSU37770, BSU37780, BSU40340, BSU40330, BSU40320, BSU11220, BSU11190, BSU11200
SigA	SigA	-0.244327	0.0126582	0.0218465	BSU01370, BSU37180, BSU14580, BSU01390, BSU19970, BSU01160, BSU03510, BSU24960, BSU01210, BSU30460, BSU08110, BSU23550, BSU33130, BSU00840, BSU01190, BSU14590, BSU01400, BSU28790, BSU01180, BSU08100, BSU01220, BSU01389, BSU09280, BSU01410, BSU01170, BSU26830, BSU03480, BSU01320, BSU24990, BSU33120, BSU01300, BSU31220, BSU01230, BSU39700, BSU39410, BSU01200, BSU31900, BSU28810, BSU38590, BSU25490,…
SigW	SigW	-0.493254	0.0132979	0.0218465	BSU25370, BSU38940, BSU06200, BSU14350, BSU29530, BSU06290, BSU06190, BSU06180, BSU17840

## Sheet: wild type 48 °C vs. rel 48 °C
wild type 48 °C vs. Δrel 48 °C
enriched categories	Description	enrichmentScore	pvalue	p.adjust	enriched genes	gene names
SW 2.3.1.12	Biosynthesis, acquisition of branched-chain amino acids	0.777049	0.0015291	0.0051151	BSU28300, BSU28290, BSU28270, BSU28310, BSU28280, BSU21870, BSU28250, BSU28260, BSU09460, BSU21770, BSU38550
SW 2.3.1.10	Biosynthesis, acquisition of methionine, S-adenosylmethionine	0.668537	0.0031056	0.0051151	BSU13580, BSU13550, BSU13620, BSU13560, BSU13570, BSU11880, BSU13610, BSU13180, BSU11870, BSU13600, BSU13590
SW 4.3.1	General stress proteins (controlled by SigB)	0.367391	0.0038363	0.0051151	BSU36720, BSU18520, BSU18510, BSU39810, BSU09690, BSU08570, BSU30930, BSU24740, BSU24750, BSU38930, BSU24770, BSU37240, BSU09390, BSU24000, BSU07750, BSU06660, BSU19150, BSU37210, BSU12150, BSU38180, BSU30700, BSU13020, BSU35310, BSU28340, BSU02110, BSU11839, BSU08510, BSU04430, BSU39050, BSU09140, BSU38830, BSU04370, BSU38430, BSU04710, BSU14660, BSU33850, BSU00160, BSU02590, BSU13170, BSU06590,…
enriched regulons	Description	enrichmentScore	pvalue	p.adjust	enriched genes	gene names
SigB	SigB	0.355731	0.0013055	0.0033835	BSU36720, BSU18520, BSU18510, BSU39810, BSU40529, BSU09690, BSU08570, BSU30930, BSU24740, BSU24750, BSU38930, BSU24770, BSU37240, BSU09390, BSU24000, BSU07750, BSU40570, BSU06660, BSU19150, BSU37210, BSU12150, BSU38180, BSU30700, BSU13020, BSU35310, BSU28340, BSU02110, BSU11839, BSU08510, BSU30640, BSU04430, BSU04039, BSU39050, BSU09140, BSU38830, BSU13169, BSU04370, BSU38430, BSU04710, BSU14660,…
CodY	CodY	0.416671	0.0014006	0.0033835	BSU28300, BSU28290, BSU28270, BSU32610, BSU28310, BSU28280, BSU32090, BSU21870, BSU28250, BSU32600, BSU28260, BSU32590, BSU09460, BSU10450, BSU32580, BSU11360, BSU10460, BSU21770, BSU38550, BSU32240, BSU06310
TnrA	TnrA	0.556901	0.0014793	0.0033835	BSU18440, BSU18450, BSU28300, BSU28290, BSU28270, BSU28310, BSU19579, BSU28280, BSU19580, BSU32090, BSU28250, BSU28260, BSU11360, BSU32240, BSU06310, BSU11381
S-box	S-box	0.635628	0.0015038	0.0033835	BSU13550, BSU13620, BSU18550, BSU13560, BSU11880, BSU13610, BSU18540, BSU38960, BSU15590, BSU15580, BSU18560, BSU13180, BSU15570, BSU11870, BSU13600, BSU11010, BSU13590
AbrB	AbrB	-0.578187	0.003125	0.005625	BSU31970, BSU05860, BSU14350, BSU31980, BSU35930, BSU05880, BSU05820, BSU05810, BSU05830, BSU05870, BSU35940, BSU35950, BSU05840, BSU35960
CcpA	CcpA	-0.42559	0.0038911	0.0058366	BSU12380, BSU28770, BSU37790, BSU22110, BSU32840, BSU05860, BSU12310, BSU12390, BSU34160, BSU35930, BSU02130, BSU28810, BSU17600, BSU05880, BSU05820, BSU12000, BSU05810, BSU05830, BSU05870, BSU35940, BSU35950, BSU05840, BSU12300, BSU35960
SigA	SigA	-0.303778	0.0059172	0.0076078	BSU01630, BSU24960, BSU24950, BSU15500, BSU23560, BSU01310, BSU06430, BSU02140, BSU12380, BSU28770, BSU36770, BSU06020, BSU31970, BSU22110, BSU32840, BSU05860, BSU12310, BSU12390, BSU24990, BSU15490, BSU34160, BSU13700, BSU24970, BSU31980, BSU35930, BSU02130, BSU28810, BSU17600, BSU05880, BSU05820, BSU12000, BSU12030, BSU05810, BSU23580, BSU05830, BSU05870, BSU35940, BSU23570, BSU35950, BSU05840,…

[truncated: 1 more sheets: wt 48 °C vs. ppGpp0 48 °C]
